# Supplementary material
Source: PubMed Central journal article supplement (PMC5013929)
Supplement: supp_kwv249_kwv249supp.pdf [file supp_kwv249_kwv249supp.pdf]

**Appendix**

**Web Table 1:** Sample sizes across years and states by studied population, from the Behavioral Risk Factor Surveillance System (1993-2012). Survey sample weights are applied to generate estimates correcting for non-response and differential sampling probability, taking into account the survey method, which attempts to produce state- and nationally-representative population samples.

|                       | Year |    |    |    |    |    |    |    |    |    |    |    |    |    |    |    |    |    |    |    |     |  |
|-----------------------|------|----|----|----|----|----|----|----|----|----|----|----|----|----|----|----|----|----|----|----|-----|--|
|                       | 93   | 94 | 95 | 96 | 97 | 98 | 99 | 00 | 01 | 02 | 03 | 04 | 05 | 06 | 07 | 08 | 09 | 10 | 11 | 12 | All |  |
| <b>Single mothers</b> |      |    |    |    |    |    |    |    |    |    |    |    |    |    |    |    |    |    |    |    |     |  |

|    |          |          |          |          |          |          |          |          |          |          |          |          |          |          |          |          |          |          |          |      |       |
|----|----------|----------|----------|----------|----------|----------|----------|----------|----------|----------|----------|----------|----------|----------|----------|----------|----------|----------|----------|------|-------|
| AL | 98       | 141      | 131      | 146      | 155      | 165      | 130      | 134      | 146      | 139      | 180      | 181      | 174      | 176      | 162      | 209      | 188      | 184      | 218      | 431  | 3486  |
| AK | 19       | 17       | 16       | 18       | 20       | 22       | 25       | 22       | 23       | 25       | 24       | 18       | 23       | 24       | 22       | 28       | 23       | 25       | 33       | 49   | 477   |
| AZ | 118      | 184      | 119      | 118      | 140      | 110      | 101      | 157      | 192      | 186      | 205      | 239      | 229      | 239      | 215      | 246      | 196      | 250      | 284      | 669  | 4196  |
| AR | 66       | 68       | 45       | 66       | 52       | 71       | 78       | 85       | 80       | 90       | 82       | 88       | 75       | 89       | 77       | 81       | 83       | 92       | 128      | 284  | 1780  |
| CA | 112<br>2 | 101<br>6 | 499<br>8 | 117<br>0 | 138<br>2 | 136<br>8 | 151<br>5 | 157<br>6 | 160<br>3 | 148<br>6 | 146<br>2 | 170<br>6 | 150<br>2 | 185<br>8 | 176<br>3 | 217<br>2 | 185<br>9 | 189<br>6 | 207<br>9 | 4136 | 37666 |
| CO | 101      | 97       | 91       | 105      | 107      | 101      | 120      | 110      | 160      | 123      | 143      | 120      | 146      | 139      | 158      | 135      | 152      | 161      | 171      | 455  | 2896  |
| CT | 78       | 85       | 90       | 87       | 88       | 94       | 73       | 96       | 109      | 91       | 94       | 100      | 98       | 94       | 105      | 103      | 113      | 115      | 126      | 294  | 2134  |
| DE | 21       | 24       | 24       | 22       | 21       | 19       | 28       | 24       | 28       | 32       | 27       | 31       | 29       | 29       | 31       | 42       | 30       | 37       | 42       | 89   | 628   |
| DC | 21       | 27       | 0        | 32       | 28       | 35       | 32       | 29       | 33       | 25       | 30       | 29       | 29       | 32       | 26       | 30       | 27       | 23       | 30       | 65   | 584   |
| FL | 342      | 399      | 372      | 432      | 515      | 504      | 404      | 526      | 480      | 600      | 573      | 568      | 591      | 649      | 590      | 648      | 669      | 598      | 798      | 1686 | 11945 |
| GA | 250      | 281      | 207      | 206      | 215      | 304      | 250      | 327      | 332      | 339      | 407      | 420      | 401      | 383      | 349      | 372      | 455      | 333      | 495      | 1059 | 7385  |
| HI | 26       | 30       | 32       | 42       | 33       | 42       | 36       | 36       | 39       | 34       | 43       | 0        | 47       | 41       | 52       | 53       | 56       | 53       | 59       | 119  | 874   |
| ID | 22       | 28       | 26       | 24       | 29       | 27       | 32       | 33       | 30       | 40       | 33       | 38       | 36       | 41       | 45       | 49       | 38       | 55       | 55       | 127  | 809   |
| IL | 388      | 364      | 366      | 420      | 408      | 321      | 337      | 437      | 456      | 420      | 432      | 463      | 408      | 509      | 441      | 488      | 570      | 391      | 529      | 1158 | 9307  |
| IN | 147      | 167      | 172      | 170      | 182      | 205      | 245      | 195      | 160      | 227      | 208      | 235      | 213      | 231      | 208      | 258      | 248      | 237      | 248      | 527  | 4483  |
| IA | 41       | 50       | 64       | 63       | 59       | 60       | 60       | 53       | 64       | 73       | 68       | 68       | 82       | 72       | 81       | 74       | 78       | 96       | 121      | 223  | 1549  |
| KS | 41       | 50       | 40       | 49       | 43       | 51       | 49       | 61       | 67       | 67       | 66       | 73       | 70       | 84       | 72       | 68       | 79       | 81       | 116      | 204  | 1430  |
| KY | 68       | 96       | 77       | 106      | 100      | 96       | 100      | 91       | 129      | 127      | 124      | 128      | 132      | 131      | 127      | 133      | 126      | 118      | 173      | 281  | 2464  |
| LA | 188      | 177      | 163      | 163      | 164      | 181      | 211      | 202      | 208      | 214      | 226      | 198      | 164      | 180      | 171      | 182      | 178      | 198      | 234      | 467  | 4069  |

|        |     |     |     |     |     |     |     |     |     |     |     |     |     |     |     |     |     |     |     |      |       |
|--------|-----|-----|-----|-----|-----|-----|-----|-----|-----|-----|-----|-----|-----|-----|-----|-----|-----|-----|-----|------|-------|
| ME     | 31  | 31  | 23  | 27  | 29  | 28  | 35  | 29  | 25  | 34  | 38  | 36  | 37  | 33  | 41  | 37  | 30  | 35  | 44  | 78   | 702   |
| M<br>D | 165 | 158 | 172 | 137 | 140 | 206 | 192 | 187 | 188 | 194 | 194 | 210 | 203 | 209 | 196 | 230 | 215 | 215 | 262 | 505  | 4177  |
| M<br>A | 197 | 152 | 185 | 165 | 155 | 166 | 163 | 187 | 188 | 184 | 189 | 167 | 227 | 206 | 207 | 188 | 189 | 180 | 237 | 533  | 4066  |
| MI     | 295 | 305 | 302 | 338 | 284 | 366 | 280 | 304 | 367 | 390 | 357 | 391 | 359 | 345 | 311 | 367 | 315 | 397 | 377 | 763  | 7213  |
| M<br>N | 90  | 109 | 106 | 111 | 115 | 82  | 119 | 99  | 116 | 140 | 102 | 137 | 128 | 133 | 142 | 141 | 136 | 162 | 186 | 343  | 2696  |
| MS     | 127 | 123 | 144 | 117 | 127 | 128 | 115 | 132 | 148 | 157 | 139 | 139 | 153 | 152 | 143 | 137 | 148 | 136 | 162 | 350  | 2976  |
| M<br>O | 159 | 129 | 164 | 151 | 176 | 176 | 178 | 161 | 166 | 191 | 202 | 201 | 202 | 216 | 204 | 206 | 216 | 243 | 226 | 469  | 4036  |
| MT     | 19  | 22  | 19  | 22  | 22  | 18  | 18  | 23  | 26  | 26  | 18  | 25  | 23  | 29  | 27  | 24  | 33  | 31  | 32  | 63   | 520   |
| NE     | 33  | 29  | 34  | 36  | 42  | 37  | 38  | 37  | 35  | 45  | 45  | 45  | 53  | 54  | 57  | 50  | 50  | 54  | 78  | 148  | 1003  |
| NV     | 29  | 39  | 49  | 51  | 42  | 72  | 54  | 75  | 76  | 94  | 98  | 100 | 111 | 99  | 100 | 106 | 97  | 68  | 132 | 270  | 1764  |
| NH     | 21  | 25  | 21  | 28  | 24  | 28  | 36  | 28  | 36  | 35  | 32  | 36  | 39  | 38  | 34  | 38  | 33  | 29  | 43  | 69   | 671   |
| NJ     | 174 | 201 | 291 | 198 | 191 | 220 | 240 | 260 | 250 | 266 | 275 | 317 | 306 | 257 | 282 | 270 | 249 | 294 | 365 | 809  | 5716  |
| N<br>M | 48  | 49  | 60  | 58  | 69  | 72  | 79  | 72  | 68  | 68  | 79  | 77  | 77  | 85  | 73  | 91  | 93  | 86  | 112 | 227  | 1643  |
| NY     | 659 | 555 | 439 | 533 | 536 | 683 | 625 | 742 | 778 | 743 | 818 | 814 | 814 | 726 | 908 | 698 | 748 | 654 | 915 | 1683 | 15071 |
| NC     | 168 | 213 | 179 | 204 | 212 | 193 | 190 | 211 | 263 | 237 | 267 | 284 | 268 | 269 | 302 | 316 | 325 | 353 | 481 | 797  | 5731  |
| ND     | 13  | 11  | 12  | 11  | 14  | 9   | 14  | 9   | 14  | 13  | 15  | 12  | 19  | 16  | 18  | 16  | 18  | 15  | 18  | 38   | 303   |
| OH     | 293 | 287 | 278 | 329 | 314 | 355 | 365 | 340 | 322 | 406 | 345 | 327 | 355 | 382 | 416 | 357 | 394 | 390 | 547 | 918  | 7720  |

|                        |     |     |     |     |     |     |     |     |     |     |     |     |     |     |     |          |          |     |          |      |       |
|------------------------|-----|-----|-----|-----|-----|-----|-----|-----|-----|-----|-----|-----|-----|-----|-----|----------|----------|-----|----------|------|-------|
| OK                     | 62  | 82  | 82  | 80  | 82  | 74  | 94  | 87  | 114 | 105 | 112 | 131 | 129 | 127 | 139 | 128      | 138      | 150 | 162      | 355  | 2433  |
| OR                     | 92  | 77  | 97  | 85  | 90  | 99  | 75  | 107 | 111 | 97  | 102 | 126 | 122 | 125 | 110 | 123      | 85       | 84  | 146      | 279  | 2230  |
| PA                     | 269 | 338 | 334 | 422 | 313 | 348 | 336 | 328 | 401 | 430 | 428 | 432 | 413 | 397 | 420 | 420      | 440      | 370 | 526      | 1089 | 8456  |
| RI                     | 29  | 0   | 31  | 34  | 23  | 28  | 31  | 36  | 36  | 36  | 38  | 37  | 40  | 41  | 34  | 37       | 42       | 31  | 51       | 82   | 715   |
| SC                     | 125 | 143 | 111 | 147 | 107 | 127 | 129 | 138 | 185 | 175 | 185 | 157 | 167 | 152 | 171 | 178      | 160      | 173 | 230      | 452  | 3411  |
| SD                     | 16  | 13  | 16  | 14  | 17  | 16  | 15  | 18  | 17  | 19  | 20  | 17  | 19  | 20  | 18  | 22       | 20       | 27  | 32       | 54   | 412   |
| TN                     | 126 | 134 | 129 | 129 | 145 | 150 | 132 | 156 | 173 | 192 | 180 | 198 | 183 | 187 | 224 | 226      | 244      | 183 | 275      | 488  | 3852  |
| TX                     | 487 | 527 | 433 | 753 | 708 | 654 | 748 | 814 | 738 | 964 | 922 | 997 | 926 | 823 | 967 | 108<br>4 | 100<br>9 | 958 | 149<br>4 | 2993 | 18999 |
| UT                     | 52  | 49  | 42  | 73  | 55  | 71  | 60  | 55  | 61  | 60  | 74  | 65  | 77  | 94  | 89  | 84       | 105      | 94  | 122      | 230  | 1610  |
| VT                     | 9   | 13  | 8   | 17  | 13  | 16  | 14  | 15  | 14  | 14  | 15  | 15  | 16  | 15  | 17  | 16       | 15       | 13  | 19       | 35   | 311   |
| VA                     | 158 | 226 | 217 | 193 | 173 | 181 | 233 | 226 | 195 | 233 | 216 | 270 | 198 | 208 | 260 | 184      | 235      | 235 | 295      | 634  | 4773  |
| W<br>A                 | 127 | 139 | 147 | 157 | 143 | 162 | 204 | 183 | 136 | 189 | 177 | 180 | 183 | 181 | 185 | 184      | 197      | 199 | 251      | 425  | 3748  |
| W<br>V                 | 33  | 35  | 41  | 36  | 32  | 32  | 32  | 44  | 48  | 54  | 47  | 41  | 44  | 61  | 38  | 34       | 42       | 46  | 64       | 121  | 925   |
| WI                     | 98  | 136 | 143 | 126 | 104 | 123 | 166 | 162 | 146 | 133 | 149 | 137 | 172 | 172 | 127 | 151      | 179      | 147 | 180      | 418  | 3168  |
| W<br>Y                 | 0   | 8   | 12  | 11  | 10  | 11  | 14  | 12  | 8   | 14  | 13  | 10  | 15  | 13  | 16  | 15       | 13       | 16  | 20       | 26   | 258   |
| <b>Married mothers</b> |     |     |     |     |     |     |     |     |     |     |     |     |     |     |     |          |          |     |          |      |       |

|    |          |          |          |          |          |          |          |          |          |          |          |          |          |          |          |          |          |          |          |      |       |
|----|----------|----------|----------|----------|----------|----------|----------|----------|----------|----------|----------|----------|----------|----------|----------|----------|----------|----------|----------|------|-------|
| AL | 243      | 335      | 310      | 305      | 281      | 345      | 291      | 323      | 303      | 340      | 334      | 340      | 273      | 358      | 366      | 352      | 390      | 298      | 287      | 552  | 6626  |
| AK | 57       | 62       | 65       | 67       | 53       | 53       | 60       | 58       | 55       | 64       | 58       | 56       | 50       | 51       | 55       | 70       | 64       | 62       | 49       | 110  | 1221  |
| AZ | 327      | 290      | 304      | 332      | 339      | 314      | 402      | 377      | 396      | 423      | 476      | 508      | 487      | 521      | 701      | 609      | 681      | 529      | 458      | 921  | 9396  |
| AR | 182      | 201      | 168      | 196      | 183      | 220      | 190      | 189      | 195      | 195      | 208      | 204      | 205      | 220      | 238      | 236      | 261      | 257      | 184      | 377  | 4309  |
| CA | 268<br>0 | 271<br>1 | 643<br>3 | 271<br>1 | 248<br>4 | 264<br>0 | 292<br>3 | 269<br>8 | 266<br>9 | 306<br>1 | 310<br>2 | 320<br>1 | 356<br>3 | 309<br>6 | 329<br>3 | 353<br>1 | 358<br>9 | 341<br>7 | 262<br>5 | 5359 | 65787 |
| CO | 296      | 321      | 315      | 331      | 311      | 298      | 338      | 377      | 322      | 386      | 389      | 405      | 420      | 447      | 453      | 472      | 498      | 504      | 364      | 768  | 8014  |
| CT | 278      | 308      | 273      | 228      | 246      | 255      | 272      | 250      | 278      | 278      | 293      | 287      | 295      | 287      | 318      | 330      | 298      | 297      | 252      | 481  | 5803  |
| DE | 57       | 52       | 52       | 47       | 52       | 51       | 56       | 54       | 59       | 50       | 61       | 56       | 68       | 70       | 65       | 63       | 69       | 68       | 55       | 100  | 1204  |
| DC | 21       | 16       | 0        | 17       | 10       | 13       | 5        | 17       | 18       | 19       | 24       | 20       | 18       | 22       | 30       | 24       | 29       | 32       | 19       | 38   | 393   |
| FL | 896      | 880      | 933      | 108<br>3 | 923      | 107<br>8 | 998      | 944      | 111<br>7 | 953      | 125<br>0 | 127<br>2 | 127<br>9 | 116<br>0 | 133<br>0 | 128<br>2 | 146<br>0 | 136<br>9 | 110<br>9 | 2008 | 23325 |
| GA | 496      | 524      | 610      | 567      | 601      | 562      | 537      | 601      | 611      | 685      | 647      | 722      | 722      | 793      | 866      | 882      | 880      | 932      | 629      | 1311 | 14177 |
| HI | 94       | 101      | 94       | 109      | 97       | 97       | 115      | 100      | 91       | 106      | 94       | 0        | 106      | 107      | 114      | 124      | 103      | 113      | 95       | 200  | 2057  |
| ID | 112      | 110      | 110      | 113      | 107      | 116      | 112      | 119      | 116      | 126      | 135      | 132      | 124      | 143      | 154      | 166      | 178      | 168      | 138      | 285  | 2763  |
| IL | 866      | 922      | 944      | 100<br>0 | 100<br>8 | 944      | 971      | 986      | 105<br>6 | 106<br>6 | 103<br>0 | 114<br>2 | 109<br>3 | 108<br>8 | 114<br>9 | 104<br>4 | 101<br>2 | 132<br>2 | 932      | 1572 | 21147 |
| IN | 469      | 498      | 462      | 470      | 507      | 470      | 405      | 460      | 494      | 525      | 500      | 494      | 506      | 480      | 535      | 566      | 518      | 593      | 473      | 849  | 10274 |
| IA | 244      | 249      | 250      | 243      | 238      | 242      | 251      | 248      | 243      | 235      | 228      | 261      | 273      | 289      | 275      | 290      | 282      | 293      | 223      | 452  | 5308  |
| KS | 225      | 226      | 237      | 228      | 193      | 179      | 194      | 202      | 221      | 221      | 215      | 233      | 252      | 242      | 246      | 272      | 264      | 282      | 208      | 400  | 4740  |
| KY | 295      | 306      | 282      | 290      | 273      | 287      | 283      | 294      | 299      | 295      | 338      | 322      | 327      | 355      | 370      | 363      | 388      | 398      | 293      | 557  | 6614  |

|        |          |          |          |          |          |          |          |          |          |          |          |          |          |          |          |          |          |          |          |      |       |
|--------|----------|----------|----------|----------|----------|----------|----------|----------|----------|----------|----------|----------|----------|----------|----------|----------|----------|----------|----------|------|-------|
| LA     | 319      | 363      | 330      | 307      | 317      | 351      | 327      | 313      | 318      | 307      | 286      | 311      | 291      | 352      | 393      | 336      | 382      | 312      | 261      | 515  | 6690  |
| ME     | 107      | 97       | 91       | 94       | 102      | 94       | 87       | 97       | 93       | 84       | 88       | 106      | 97       | 104      | 101      | 97       | 97       | 99       | 77       | 161  | 1972  |
| M<br>D | 395      | 350      | 426      | 429      | 366      | 359      | 372      | 423      | 398      | 393      | 456      | 454      | 447      | 417      | 490      | 470      | 473      | 441      | 356      | 760  | 8674  |
| M<br>A | 426      | 448      | 477      | 438      | 469      | 471      | 483      | 464      | 487      | 516      | 480      | 509      | 523      | 556      | 623      | 508      | 553      | 651      | 424      | 855  | 10363 |
| MI     | 822      | 751      | 796      | 773      | 875      | 789      | 823      | 866      | 779      | 853      | 796      | 821      | 836      | 823      | 864      | 908      | 904      | 792      | 669      | 1323 | 16861 |
| M<br>N | 403      | 412      | 385      | 465      | 390      | 461      | 473      | 437      | 413      | 425      | 434      | 418      | 399      | 459      | 484      | 509      | 494      | 461      | 409      | 785  | 9116  |
| MS     | 173      | 193      | 181      | 196      | 197      | 201      | 209      | 186      | 197      | 195      | 188      | 193      | 209      | 224      | 215      | 219      | 224      | 216      | 144      | 296  | 4057  |
| M<br>O | 476      | 442      | 430      | 443      | 411      | 510      | 408      | 426      | 467      | 443      | 465      | 442      | 479      | 480      | 478      | 500      | 582      | 482      | 378      | 811  | 9552  |
| MT     | 76       | 78       | 89       | 78       | 69       | 78       | 68       | 68       | 69       | 67       | 73       | 68       | 80       | 77       | 82       | 85       | 87       | 85       | 79       | 143  | 1599  |
| NE     | 142      | 145      | 160      | 154      | 144      | 150      | 145      | 154      | 138      | 147      | 153      | 164      | 165      | 171      | 184      | 177      | 192      | 175      | 143      | 278  | 3282  |
| NV     | 107      | 100      | 136      | 130      | 126      | 123      | 103      | 132      | 128      | 157      | 157      | 187      | 208      | 209      | 220      | 235      | 202      | 232      | 208      | 340  | 3440  |
| NH     | 99       | 95       | 107      | 102      | 112      | 95       | 96       | 107      | 99       | 106      | 109      | 106      | 111      | 114      | 112      | 117      | 118      | 110      | 86       | 172  | 2172  |
| NJ     | 657      | 620      | 660      | 705      | 671      | 671      | 579      | 665      | 662      | 719      | 685      | 710      | 705      | 723      | 845      | 716      | 736      | 702      | 598      | 1131 | 14160 |
| N<br>M | 134      | 135      | 120      | 150      | 153      | 132      | 144      | 144      | 154      | 148      | 147      | 145      | 150      | 144      | 156      | 151      | 158      | 157      | 128      | 244  | 2994  |
| NY     | 125<br>4 | 125<br>5 | 119<br>2 | 136<br>5 | 122<br>2 | 128<br>7 | 119<br>3 | 138<br>1 | 149<br>4 | 133<br>1 | 144<br>7 | 152<br>5 | 131<br>4 | 141<br>1 | 137<br>0 | 138<br>2 | 143<br>4 | 165<br>4 | 110<br>4 | 2407 | 28021 |
| NC     | 431      | 510      | 572      | 539      | 470      | 523      | 529      | 600      | 576      | 584      | 651      | 637      | 634      | 652      | 733      | 717      | 751      | 756      | 571      | 1148 | 12584 |

|    |      |      |      |      |      |      |      |      |      |      |      |      |      |      |      |      |      |      |      |      |       |
|----|------|------|------|------|------|------|------|------|------|------|------|------|------|------|------|------|------|------|------|------|-------|
| ND | 59   | 61   | 59   | 55   | 55   | 55   | 52   | 56   | 53   | 52   | 51   | 56   | 50   | 54   | 57   | 52   | 56   | 58   | 47   | 97   | 1135  |
| OH | 941  | 774  | 888  | 903  | 896  | 866  | 936  | 847  | 866  | 817  | 1015 | 862  | 909  | 981  | 977  | 934  | 977  | 1118 | 737  | 1347 | 18590 |
| OK | 235  | 271  | 213  | 284  | 283  | 264  | 273  | 236  | 243  | 269  | 266  | 278  | 284  | 288  | 316  | 335  | 334  | 341  | 250  | 465  | 5728  |
| OR | 251  | 254  | 250  | 261  | 295  | 237  | 280  | 260  | 255  | 255  | 266  | 264  | 290  | 303  | 329  | 316  | 339  | 347  | 249  | 521  | 5821  |
| PA | 973  | 938  | 901  | 913  | 891  | 842  | 908  | 951  | 899  | 924  | 932  | 871  | 892  | 911  | 928  | 884  | 914  | 1113 | 733  | 1546 | 18865 |
| RI | 65   | 0    | 69   | 69   | 69   | 67   | 72   | 72   | 72   | 74   | 77   | 76   | 77   | 81   | 90   | 79   | 85   | 79   | 57   | 115  | 1446  |
| SC | 274  | 272  | 249  | 223  | 235  | 268  | 291  | 299  | 286  | 272  | 278  | 307  | 304  | 322  | 374  | 357  | 357  | 326  | 254  | 494  | 6042  |
| SD | 69   | 59   | 55   | 65   | 60   | 63   | 63   | 63   | 61   | 58   | 65   | 67   | 64   | 67   | 67   | 67   | 77   | 72   | 60   | 122  | 1344  |
| TN | 336  | 351  | 350  | 295  | 327  | 357  | 393  | 420  | 433  | 404  | 417  | 478  | 420  | 447  | 437  | 514  | 517  | 463  | 347  | 703  | 8408  |
| TX | 1528 | 1786 | 1816 | 1506 | 1626 | 1732 | 1712 | 1821 | 2002 | 1818 | 1893 | 1969 | 2177 | 2203 | 2402 | 2243 | 2719 | 2668 | 1774 | 3423 | 40819 |
| UT | 207  | 192  | 223  | 200  | 217  | 213  | 218  | 220  | 226  | 232  | 257  | 274  | 279  | 291  | 335  | 360  | 336  | 346  | 306  | 586  | 5518  |
| VT | 51   | 49   | 51   | 46   | 48   | 44   | 47   | 47   | 46   | 48   | 47   | 52   | 48   | 46   | 48   | 48   | 45   | 48   | 38   | 78   | 974   |
| VA | 493  | 508  | 532  | 540  | 551  | 588  | 611  | 473  | 511  | 550  | 561  | 585  | 566  | 588  | 711  | 685  | 666  | 643  | 535  | 1042 | 11939 |
| WA | 408  | 425  | 461  | 452  | 440  | 432  | 491  | 434  | 449  | 502  | 498  | 519  | 533  | 544  | 579  | 590  | 570  | 591  | 455  | 1005 | 10381 |
| WV | 122  | 124  | 131  | 126  | 124  | 114  | 119  | 130  | 123  | 127  | 131  | 122  | 118  | 114  | 127  | 122  | 122  | 107  | 97   | 196  | 2494  |
| WI | 323  | 446  | 418  | 410  | 428  | 407  | 353  | 364  | 400  | 410  | 422  | 477  | 423  | 486  | 480  | 437  | 438  | 537  | 449  | 725  | 8834  |

|                           |   |    |    |    |    |    |    |    |    |    |    |    |    |    |    |    |    |    |    |    |     |
|---------------------------|---|----|----|----|----|----|----|----|----|----|----|----|----|----|----|----|----|----|----|----|-----|
| W<br>Y                    | 0 | 52 | 53 | 44 | 46 | 44 | 40 | 40 | 42 | 40 | 42 | 43 | 41 | 44 | 46 | 43 | 47 | 49 | 44 | 99 | 898 |
| <b>Single non-mothers</b> |   |    |    |    |    |    |    |    |    |    |    |    |    |    |    |    |    |    |    |    |     |



|    |          |          |          |          |          |          |          |          |          |          |          |          |          |          |          |          |          |          |          |           |            |
|----|----------|----------|----------|----------|----------|----------|----------|----------|----------|----------|----------|----------|----------|----------|----------|----------|----------|----------|----------|-----------|------------|
| AL | 568      | 463      | 494      | 468      | 499      | 538      | 654      | 636      | 642      | 680      | 650      | 666      | 752      | 742      | 727      | 809      | 786      | 854      | 103<br>8 | 2277      | 14944      |
| AK | 48       | 55       | 58       | 67       | 74       | 71       | 80       | 75       | 87       | 86       | 84       | 90       | 95       | 92       | 97       | 78       | 108      | 100      | 132      | 264       | 1841       |
| AZ | 481      | 544      | 554      | 631      | 707      | 965      | 842      | 584      | 790      | 861      | 770      | 741      | 795      | 871      | 827      | 101<br>8 | 106<br>0 | 965      | 131<br>4 | 2615      | 17935      |
| AR | 228      | 267      | 304      | 241      | 254      | 260      | 309      | 332      | 342      | 370      | 362      | 360      | 387      | 401      | 399      | 403      | 448      | 499      | 561      | 1249      | 7975       |
| CA | 446<br>9 | 442<br>6 | 0        | 446<br>6 | 463<br>8 | 461<br>9 | 477<br>9 | 523<br>0 | 529<br>4 | 565<br>0 | 576<br>1 | 552<br>4 | 570<br>1 | 622<br>9 | 565<br>9 | 561<br>5 | 610<br>7 | 629<br>1 | 792<br>3 | 1725<br>5 | 11563<br>6 |
| CO | 473      | 503      | 501      | 608      | 550      | 652      | 596      | 628      | 688      | 711      | 717      | 702      | 662      | 650      | 701      | 729      | 715      | 807      | 103<br>4 | 2128      | 14756      |
| CT | 383      | 426      | 489      | 512      | 543      | 515      | 548      | 575      | 581      | 591      | 561      | 570      | 594      | 628      | 560      | 619      | 608      | 617      | 832      | 1684      | 12435      |
| DE | 95       | 102      | 104      | 123      | 126      | 135      | 120      | 124      | 138      | 152      | 154      | 153      | 138      | 146      | 150      | 155      | 160      | 162      | 200      | 420       | 3057       |
| DC | 239      | 208      | 0        | 188      | 192      | 195      | 222      | 184      | 178      | 209      | 190      | 191      | 190      | 181      | 184      | 183      | 204      | 197      | 262      | 556       | 4151       |
| FL | 164<br>4 | 164<br>4 | 168<br>3 | 195<br>6 | 196<br>4 | 219<br>3 | 245<br>3 | 255<br>3 | 266<br>5 | 320<br>9 | 293<br>5 | 280<br>3 | 295<br>5 | 313<br>6 | 327<br>9 | 339<br>7 | 327<br>0 | 343<br>6 | 452<br>3 | 9480      | 61177      |
| GA | 877      | 989      | 103<br>8 | 101<br>9 | 103<br>6 | 106<br>5 | 121<br>2 | 124<br>5 | 130<br>8 | 128<br>4 | 134<br>5 | 133<br>7 | 128<br>2 | 135<br>4 | 138<br>2 | 149<br>7 | 140<br>1 | 141<br>2 | 208<br>9 | 4585      | 28756      |
| HI | 155      | 133      | 168      | 163      | 166      | 187      | 157      | 169      | 187      | 185      | 203      | 0        | 180      | 197      | 192      | 203      | 212      | 226      | 279      | 609       | 3971       |
| ID | 85       | 84       | 110      | 114      | 109      | 130      | 141      | 132      | 159      | 167      | 154      | 175      | 177      | 185      | 177      | 185      | 189      | 192      | 263      | 490       | 3416       |
| IL | 152<br>6 | 191<br>9 | 156<br>9 | 160<br>0 | 172<br>5 | 187<br>1 | 194<br>1 | 205<br>1 | 196<br>2 | 202<br>0 | 222<br>9 | 185<br>1 | 211<br>7 | 215<br>6 | 213<br>2 | 219<br>2 | 231<br>3 | 219<br>1 | 293<br>1 | 5888      | 44185      |
| IN | 661      | 624      | 682      | 712      | 667      | 842      | 107<br>2 | 834      | 839      | 870      | 925      | 859      | 998      | 938      | 959      | 993      | 102<br>0 | 948      | 133<br>0 | 2823      | 19594      |

|        |      |      |      |      |      |      |      |      |      |      |      |      |      |      |      |      |      |      |      |      |       |
|--------|------|------|------|------|------|------|------|------|------|------|------|------|------|------|------|------|------|------|------|------|-------|
| IA     | 288  | 306  | 334  | 320  | 332  | 348  | 370  | 370  | 382  | 423  | 432  | 408  | 381  | 405  | 420  | 407  | 431  | 417  | 571  | 1220 | 8569  |
| KS     | 279  | 284  | 284  | 332  | 340  | 379  | 345  | 386  | 385  | 402  | 417  | 399  | 395  | 392  | 395  | 374  | 427  | 425  | 554  | 1186 | 8381  |
| KY     | 453  | 434  | 468  | 491  | 497  | 484  | 502  | 583  | 640  | 642  | 630  | 697  | 650  | 612  | 614  | 586  | 588  | 663  | 882  | 1963 | 13078 |
| LA     | 503  | 481  | 523  | 568  | 584  | 497  | 588  | 640  | 660  | 697  | 678  | 745  | 606  | 728  | 663  | 721  | 771  | 839  | 1021 | 2185 | 14698 |
| ME     | 165  | 175  | 138  | 185  | 189  | 200  | 217  | 186  | 217  | 240  | 233  | 247  | 242  | 257  | 253  | 252  | 250  | 261  | 318  | 619  | 4843  |
| M<br>D | 734  | 745  | 719  | 711  | 874  | 818  | 965  | 880  | 959  | 983  | 989  | 946  | 1027 | 978  | 1008 | 1047 | 1027 | 1123 | 1436 | 3055 | 21025 |
| M<br>A | 1101 | 1214 | 1022 | 1230 | 1076 | 1160 | 1120 | 1235 | 1226 | 1264 | 1262 | 1289 | 1275 | 1166 | 1095 | 1243 | 1220 | 1120 | 1728 | 3488 | 26533 |
| MI     | 1215 | 1260 | 1064 | 1219 | 1356 | 1464 | 1455 | 1475 | 1579 | 1519 | 1566 | 1487 | 1576 | 1632 | 1692 | 1715 | 1720 | 1747 | 2122 | 4596 | 33460 |
| M<br>N | 579  | 593  | 630  | 549  | 591  | 636  | 646  | 679  | 790  | 796  | 746  | 787  | 749  | 786  | 784  | 756  | 821  | 780  | 1092 | 2258 | 16047 |
| MS     | 239  | 260  | 245  | 293  | 301  | 297  | 335  | 339  | 385  | 385  | 411  | 417  | 416  | 423  | 495  | 477  | 480  | 523  | 620  | 1312 | 8650  |
| M<br>O | 548  | 593  | 663  | 665  | 730  | 675  | 777  | 879  | 775  | 876  | 738  | 894  | 850  | 923  | 914  | 934  | 905  | 977  | 1324 | 2729 | 18368 |
| MT     | 77   | 78   | 77   | 89   | 116  | 92   | 116  | 119  | 145  | 134  | 130  | 136  | 130  | 142  | 136  | 143  | 132  | 154  | 203  | 387  | 2736  |
| NE     | 183  | 200  | 193  | 171  | 203  | 203  | 231  | 221  | 233  | 247  | 230  | 237  | 236  | 226  | 221  | 242  | 230  | 246  | 329  | 689  | 4973  |
| NV     | 123  | 154  | 169  | 216  | 251  | 266  | 356  | 323  | 363  | 345  | 374  | 360  | 346  | 419  | 419  | 427  | 427  | 440  | 516  | 1181 | 7473  |
| NH     | 168  | 172  | 154  | 151  | 170  | 190  | 199  | 206  | 204  | 218  | 209  | 225  | 206  | 208  | 205  | 202  | 226  | 219  | 283  | 586  | 4402  |

|    |      |      |      |      |      |      |      |      |      |      |      |      |      |      |      |      |      |      |      |       |       |
|----|------|------|------|------|------|------|------|------|------|------|------|------|------|------|------|------|------|------|------|-------|-------|
| NJ | 955  | 962  | 1002 | 1150 | 1370 | 1439 | 1551 | 1436 | 1506 | 1364 | 1467 | 1397 | 1409 | 1602 | 1448 | 1597 | 1592 | 1520 | 1989 | 4082  | 30837 |
| NM | 169  | 170  | 182  | 218  | 186  | 220  | 218  | 257  | 258  | 276  | 272  | 303  | 303  | 318  | 339  | 335  | 343  | 341  | 434  | 935   | 6078  |
| NY | 2924 | 3728 | 3254 | 3251 | 3548 | 3151 | 3305 | 3336 | 3599 | 3903 | 3548 | 3527 | 3851 | 3993 | 4000 | 3982 | 4026 | 4179 | 5205 | 10378 | 80690 |
| NC | 947  | 816  | 881  | 977  | 914  | 1169 | 1239 | 1289 | 1323 | 1360 | 1259 | 1368 | 1369 | 1434 | 1417 | 1515 | 1625 | 1635 | 2034 | 4474  | 29044 |
| ND | 63   | 74   | 67   | 74   | 72   | 84   | 90   | 75   | 81   | 88   | 84   | 95   | 81   | 89   | 93   | 95   | 87   | 97   | 139  | 261   | 1887  |
| OH | 1189 | 1554 | 1445 | 1321 | 1443 | 1396 | 1734 | 1773 | 2011 | 1983 | 1906 | 1887 | 1764 | 1980 | 1780 | 1892 | 1851 | 1974 | 2554 | 5424  | 38858 |
| OK | 301  | 345  | 394  | 357  | 386  | 414  | 405  | 499  | 504  | 515  | 483  | 466  | 486  | 521  | 499  | 519  | 551  | 558  | 725  | 1636  | 10564 |
| OR | 383  | 373  | 416  | 442  | 418  | 498  | 433  | 507  | 587  | 611  | 594  | 603  | 585  | 568  | 602  | 604  | 644  | 753  | 857  | 1861  | 12338 |
| PA | 1637 | 1587 | 1738 | 1599 | 1778 | 1933 | 1865 | 1859 | 2047 | 2034 | 2113 | 2268 | 2140 | 2142 | 2132 | 2256 | 2380 | 2216 | 3042 | 6132  | 44895 |
| RI | 165  | 0    | 172  | 163  | 171  | 176  | 178  | 181  | 190  | 210  | 197  | 216  | 220  | 199  | 198  | 221  | 198  | 228  | 269  | 577   | 4131  |
| SC | 353  | 435  | 474  | 505  | 588  | 588  | 570  | 618  | 671  | 673  | 587  | 694  | 650  | 682  | 658  | 685  | 740  | 864  | 1022 | 2231  | 14288 |
| SD | 74   | 69   | 68   | 78   | 84   | 81   | 82   | 85   | 92   | 102  | 87   | 97   | 101  | 100  | 109  | 105  | 106  | 104  | 160  | 299   | 2082  |
| TN | 617  | 667  | 625  | 768  | 763  | 764  | 860  | 815  | 874  | 999  | 917  | 949  | 958  | 1034 | 971  | 1000 | 1078 | 1173 | 1455 | 3141  | 20429 |
| TX | 2192 | 2026 | 2348 | 2498 | 2240 | 2433 | 2628 | 2545 | 2711 | 2867 | 2953 | 3014 | 2829 | 2748 | 2873 | 3251 | 3296 | 3172 | 4783 | 9851  | 63259 |

|                            |     |     |     |     |     |      |     |      |      |      |      |      |      |      |      |      |      |      |      |      |       |
|----------------------------|-----|-----|-----|-----|-----|------|-----|------|------|------|------|------|------|------|------|------|------|------|------|------|-------|
| UT                         | 147 | 170 | 190 | 162 | 198 | 205  | 209 | 222  | 236  | 304  | 286  | 278  | 250  | 275  | 285  | 292  | 289  | 348  | 388  | 854  | 5589  |
| VT                         | 86  | 89  | 89  | 91  | 100 | 95   | 102 | 103  | 110  | 106  | 102  | 112  | 110  | 123  | 111  | 125  | 114  | 122  | 153  | 288  | 2329  |
| VA                         | 868 | 758 | 911 | 919 | 942 | 1036 | 984 | 1080 | 1177 | 1255 | 1205 | 1164 | 1196 | 1198 | 1078 | 1282 | 1280 | 1339 | 1930 | 3902 | 25504 |
| WA                         | 656 | 677 | 672 | 773 | 818 | 832  | 833 | 896  | 1014 | 968  | 981  | 1025 | 994  | 1047 | 1056 | 1048 | 1078 | 1191 | 1526 | 3284 | 21369 |
| WV                         | 193 | 200 | 247 | 224 | 248 | 265  | 262 | 278  | 257  | 267  | 301  | 283  | 312  | 291  | 320  | 353  | 376  | 362  | 420  | 856  | 6316  |
| WI                         | 730 | 643 | 606 | 675 | 702 | 727  | 948 | 980  | 840  | 865  | 757  | 873  | 838  | 818  | 895  | 928  | 932  | 994  | 1159 | 2300 | 18210 |
| WY                         | 0   | 47  | 40  | 48  | 45  | 60   | 54  | 57   | 65   | 68   | 65   | 66   | 67   | 72   | 69   | 73   | 78   | 80   | 99   | 189  | 1340  |
| <b>Married non-mothers</b> |     |     |     |     |     |      |     |      |      |      |      |      |      |      |      |      |      |      |      |      |       |

|    |          |          |          |          |          |          |          |          |          |          |          |          |          |          |          |          |          |          |          |           |       |
|----|----------|----------|----------|----------|----------|----------|----------|----------|----------|----------|----------|----------|----------|----------|----------|----------|----------|----------|----------|-----------|-------|
| AL | 689      | 587      | 662      | 712      | 722      | 656      | 679      | 773      | 754      | 872      | 746      | 804      | 847      | 827      | 896      | 862      | 883      | 104<br>5 | 868      | 1804      | 16688 |
| AK | 69       | 65       | 79       | 76       | 81       | 79       | 82       | 81       | 71       | 78       | 94       | 97       | 98       | 108      | 114      | 117      | 108      | 121      | 106      | 246       | 1970  |
| AZ | 483      | 447      | 561      | 582      | 692      | 622      | 734      | 830      | 802      | 861      | 822      | 841      | 885      | 909      | 916      | 103<br>8 | 102<br>2 | 130<br>1 | 100<br>2 | 2073      | 17423 |
| AR | 309      | 325      | 434      | 403      | 488      | 445      | 446      | 415      | 504      | 513      | 520      | 553      | 566      | 533      | 570      | 593      | 576      | 588      | 558      | 1119      | 10459 |
| CA | 328<br>6 | 361<br>4 | 0        | 402<br>0 | 388<br>4 | 432<br>4 | 371<br>5 | 417<br>0 | 427<br>3 | 443<br>0 | 432<br>6 | 452<br>9 | 476<br>0 | 497<br>3 | 496<br>1 | 524<br>9 | 527<br>7 | 544<br>6 | 498<br>3 | 1090<br>4 | 91123 |
| CO | 435      | 414      | 525      | 511      | 674      | 611      | 617      | 729      | 707      | 730      | 764      | 777      | 791      | 774      | 808      | 855      | 891      | 865      | 878      | 1837      | 15194 |
| CT | 504      | 490      | 448      | 467      | 494      | 497      | 486      | 528      | 538      | 559      | 575      | 566      | 604      | 622      | 629      | 637      | 642      | 629      | 575      | 1234      | 11724 |
| DE | 86       | 90       | 103      | 106      | 116      | 120      | 119      | 125      | 118      | 138      | 124      | 136      | 145      | 150      | 154      | 163      | 158      | 165      | 150      | 369       | 2835  |
| DC | 38       | 56       | 0        | 44       | 49       | 32       | 32       | 48       | 57       | 52       | 51       | 60       | 58       | 64       | 70       | 80       | 73       | 80       | 48       | 112       | 1104  |
| FL | 189<br>1 | 201<br>5 | 221<br>4 | 213<br>2 | 221<br>5 | 219<br>0 | 263<br>7 | 265<br>6 | 271<br>2 | 286<br>8 | 293<br>1 | 292<br>5 | 288<br>4 | 316<br>4 | 336<br>2 | 354<br>7 | 363<br>5 | 386<br>9 | 324<br>9 | 7398      | 60494 |
| GA | 925      | 873      | 972      | 107<br>5 | 109<br>2 | 111<br>9 | 128<br>1 | 119<br>9 | 137<br>4 | 127<br>9 | 130<br>3 | 130<br>1 | 141<br>1 | 140<br>8 | 147<br>8 | 156<br>1 | 176<br>8 | 186<br>6 | 142<br>3 | 3139      | 27847 |
| HI | 123      | 118      | 167      | 151      | 153      | 176      | 167      | 168      | 169      | 178      | 183      | 0        | 213      | 202      | 215      | 215      | 219      | 230      | 221      | 472       | 3741  |
| ID | 120      | 131      | 147      | 177      | 176      | 190      | 199      | 197      | 229      | 217      | 227      | 234      | 251      | 256      | 262      | 262      | 288      | 290      | 269      | 611       | 4733  |
| IL | 145<br>4 | 149<br>5 | 165<br>8 | 166<br>1 | 159<br>9 | 189<br>1 | 194<br>7 | 172<br>6 | 186<br>2 | 181<br>9 | 202<br>7 | 198<br>4 | 207<br>4 | 192<br>9 | 213<br>5 | 209<br>0 | 221<br>2 | 210<br>7 | 204<br>7 | 4499      | 40217 |
| IN | 785      | 770      | 873      | 919      | 980      | 944      | 746      | 983      | 111<br>2 | 991      | 107<br>4 | 104<br>9 | 116<br>4 | 110<br>7 | 119<br>3 | 107<br>9 | 116<br>4 | 123<br>9 | 115<br>3 | 2395      | 21722 |

|        |          |          |          |          |          |          |          |          |          |          |          |          |          |          |          |          |          |          |          |      |       |
|--------|----------|----------|----------|----------|----------|----------|----------|----------|----------|----------|----------|----------|----------|----------|----------|----------|----------|----------|----------|------|-------|
| IA     | 417      | 412      | 402      | 434      | 437      | 466      | 478      | 509      | 530      | 554      | 541      | 561      | 574      | 609      | 618      | 631      | 617      | 640      | 609      | 1192 | 11231 |
| KS     | 362      | 391      | 376      | 390      | 459      | 499      | 523      | 467      | 469      | 478      | 454      | 491      | 511      | 510      | 535      | 550      | 546      | 536      | 519      | 1117 | 10182 |
| KY     | 509      | 557      | 603      | 629      | 694      | 714      | 722      | 693      | 691      | 706      | 710      | 744      | 747      | 818      | 840      | 902      | 946      | 940      | 859      | 1721 | 15745 |
| LA     | 551      | 477      | 603      | 527      | 609      | 630      | 637      | 632      | 641      | 677      | 699      | 742      | 646      | 726      | 712      | 748      | 791      | 783      | 741      | 1492 | 14063 |
| ME     | 164      | 171      | 227      | 199      | 187      | 204      | 207      | 230      | 237      | 248      | 221      | 242      | 264      | 263      | 287      | 290      | 289      | 290      | 289      | 591  | 5099  |
| M<br>D | 612      | 669      | 700      | 784      | 808      | 783      | 744      | 696      | 814      | 820      | 914      | 898      | 867      | 892      | 919      | 966      | 900      | 101<br>2 | 890      | 1819 | 17505 |
| M<br>A | 736      | 841      | 835      | 817      | 841      | 892      | 931      | 899      | 103<br>2 | 962      | 994      | 101<br>9 | 958      | 110<br>5 | 106<br>0 | 113<br>7 | 116<br>0 | 117<br>6 | 101<br>3 | 2132 | 20540 |
| MI     | 129<br>1 | 120<br>1 | 149<br>7 | 138<br>2 | 133<br>9 | 141<br>1 | 163<br>4 | 155<br>8 | 155<br>3 | 165<br>7 | 172<br>8 | 168<br>7 | 180<br>0 | 184<br>4 | 183<br>0 | 185<br>4 | 181<br>6 | 186<br>8 | 175<br>4 | 3730 | 34435 |
| M<br>N | 572      | 581      | 684      | 712      | 810      | 848      | 760      | 863      | 853      | 873      | 912      | 915      | 103<br>3 | 985      | 100<br>0 | 993      | 102<br>5 | 109<br>4 | 936      | 2050 | 18501 |
| MS     | 298      | 328      | 352      | 354      | 397      | 371      | 416      | 436      | 421      | 476      | 449      | 470      | 471      | 481      | 500      | 534      | 523      | 500      | 490      | 999  | 9267  |
| M<br>O | 686      | 700      | 719      | 754      | 771      | 841      | 898      | 887      | 968      | 983      | 946      | 991      | 105<br>6 | 102<br>8 | 113<br>4 | 114<br>7 | 111<br>6 | 106<br>3 | 107<br>9 | 2335 | 20103 |
| MT     | 103      | 107      | 127      | 127      | 133      | 154      | 148      | 160      | 153      | 169      | 163      | 181      | 187      | 195      | 209      | 207      | 209      | 211      | 189      | 430  | 3562  |
| NE     | 215      | 195      | 183      | 254      | 225      | 226      | 265      | 265      | 317      | 295      | 298      | 306      | 316      | 324      | 333      | 328      | 355      | 351      | 334      | 699  | 6086  |
| NV     | 173      | 170      | 241      | 212      | 231      | 244      | 250      | 308      | 344      | 344      | 337      | 345      | 300      | 377      | 391      | 424      | 453      | 461      | 374      | 758  | 6738  |
| NH     | 142      | 146      | 169      | 173      | 186      | 175      | 188      | 195      | 216      | 215      | 224      | 219      | 236      | 243      | 272      | 273      | 267      | 280      | 269      | 574  | 4662  |
| NJ     | 110<br>2 | 107<br>0 | 111<br>7 | 126<br>0 | 119<br>1 | 126<br>4 | 134<br>8 | 125<br>2 | 131<br>5 | 125<br>6 | 129<br>1 | 128<br>7 | 133<br>3 | 133<br>7 | 135<br>7 | 145<br>6 | 147<br>6 | 156<br>0 | 130<br>8 | 2803 | 27381 |

|        |          |          |          |          |          |          |          |          |          |          |          |          |          |          |          |          |          |          |          |      |       |
|--------|----------|----------|----------|----------|----------|----------|----------|----------|----------|----------|----------|----------|----------|----------|----------|----------|----------|----------|----------|------|-------|
| N<br>M | 188      | 221      | 229      | 236      | 238      | 228      | 239      | 227      | 261      | 271      | 293      | 300      | 300      | 322      | 353      | 342      | 331      | 364      | 335      | 704  | 5982  |
| NY     | 246<br>4 | 213<br>8 | 240<br>0 | 258<br>0 | 254<br>7 | 249<br>5 | 274<br>9 | 244<br>2 | 265<br>1 | 267<br>9 | 273<br>1 | 270<br>0 | 291<br>5 | 283<br>7 | 308<br>4 | 298<br>3 | 302<br>8 | 306<br>1 | 270<br>4 | 6027 | 57216 |
| NC     | 987      | 104<br>5 | 122<br>4 | 117<br>8 | 132<br>1 | 128<br>2 | 129<br>3 | 131<br>2 | 143<br>7 | 143<br>6 | 142<br>7 | 145<br>2 | 160<br>3 | 163<br>5 | 161<br>3 | 171<br>7 | 168<br>9 | 176<br>6 | 173<br>6 | 3701 | 30854 |
| ND     | 77       | 78       | 92       | 90       | 105      | 102      | 104      | 113      | 110      | 117      | 116      | 119      | 127      | 133      | 136      | 136      | 140      | 140      | 136      | 302  | 2471  |
| OH     | 166<br>3 | 171<br>1 | 175<br>8 | 160<br>2 | 190<br>7 | 183<br>0 | 175<br>5 | 190<br>2 | 177<br>8 | 188<br>9 | 185<br>2 | 214<br>8 | 212<br>0 | 210<br>2 | 208<br>8 | 225<br>8 | 219<br>7 | 210<br>5 | 206<br>8 | 4271 | 41002 |
| OK     | 524      | 469      | 575      | 495      | 513      | 639      | 597      | 640      | 602      | 633      | 622      | 638      | 651      | 643      | 679      | 694      | 711      | 715      | 697      | 1365 | 13100 |
| OR     | 392      | 412      | 390      | 462      | 474      | 604      | 563      | 550      | 534      | 598      | 598      | 589      | 642      | 709      | 705      | 742      | 769      | 767      | 747      | 1504 | 12750 |
| PA     | 157<br>6 | 163<br>8 | 174<br>8 | 183<br>1 | 200<br>3 | 200<br>8 | 190<br>3 | 202<br>9 | 217<br>6 | 209<br>7 | 232<br>5 | 203<br>4 | 226<br>9 | 245<br>0 | 241<br>5 | 251<br>2 | 242<br>8 | 252<br>2 | 239<br>5 | 4807 | 45168 |
| RI     | 143      | 0        | 127      | 135      | 146      | 159      | 142      | 146      | 156      | 164      | 162      | 173      | 175      | 192      | 175      | 194      | 182      | 192      | 172      | 350  | 3284  |
| SC     | 514      | 461      | 578      | 551      | 604      | 597      | 638      | 618      | 623      | 735      | 730      | 689      | 729      | 820      | 784      | 863      | 875      | 935      | 835      | 1792 | 14969 |
| SD     | 87       | 101      | 99       | 111      | 113      | 111      | 119      | 125      | 128      | 139      | 126      | 144      | 147      | 150      | 159      | 169      | 165      | 175      | 151      | 352  | 2870  |
| TN     | 731      | 776      | 929      | 104<br>7 | 100<br>7 | 103<br>6 | 962      | 106<br>9 | 105<br>2 | 102<br>7 | 120<br>5 | 114<br>5 | 116<br>3 | 104<br>7 | 109<br>6 | 111<br>4 | 121<br>1 | 141<br>3 | 127<br>1 | 2552 | 22854 |
| TX     | 203<br>9 | 214<br>9 | 254<br>1 | 225<br>4 | 281<br>3 | 270<br>7 | 263<br>1 | 280<br>5 | 309<br>9 | 307<br>3 | 332<br>7 | 322<br>0 | 335<br>5 | 373<br>2 | 352<br>9 | 367<br>5 | 398<br>9 | 398<br>0 | 359<br>7 | 7935 | 66450 |
| UT     | 168      | 177      | 192      | 223      | 251      | 262      | 248      | 304      | 305      | 323      | 312      | 337      | 345      | 320      | 357      | 353      | 393      | 414      | 383      | 834  | 6498  |
| VT     | 77       | 71       | 78       | 85       | 85       | 91       | 94       | 92       | 103      | 115      | 115      | 114      | 125      | 126      | 133      | 132      | 140      | 139      | 126      | 283  | 2324  |

|    |     |     |     |          |          |          |          |          |          |          |          |          |          |          |          |          |          |          |          |      |       |
|----|-----|-----|-----|----------|----------|----------|----------|----------|----------|----------|----------|----------|----------|----------|----------|----------|----------|----------|----------|------|-------|
| VA | 936 | 919 | 925 | 109<br>9 | 107<br>7 | 111<br>7 | 119<br>0 | 115<br>5 | 117<br>0 | 125<br>0 | 122<br>8 | 129<br>8 | 137<br>4 | 142<br>4 | 145<br>6 | 153<br>9 | 148<br>0 | 151<br>6 | 129<br>3 | 2962 | 26406 |
| WA | 702 | 685 | 772 | 825      | 838      | 852      | 894      | 100<br>3 | 974      | 103<br>2 | 101<br>2 | 101<br>5 | 109<br>3 | 115<br>0 | 116<br>7 | 124<br>4 | 127<br>2 | 125<br>2 | 117<br>5 | 2439 | 21395 |
| WV | 280 | 287 | 285 | 311      | 336      | 355      | 351      | 352      | 361      | 373      | 355      | 390      | 404      | 411      | 412      | 436      | 425      | 434      | 422      | 826  | 7807  |
| WI | 690 | 678 | 699 | 739      | 762      | 761      | 745      | 790      | 983      | 968      | 102<br>1 | 995      | 102<br>0 | 109<br>0 | 105<br>9 | 109<br>2 | 115<br>1 | 107<br>5 | 104<br>2 | 2386 | 19746 |
| WY | 0   | 62  | 65  | 71       | 78       | 77       | 77       | 79       | 90       | 98       | 92       | 102      | 108      | 109      | 112      | 113      | 108      | 114      | 104      | 249  | 1907  |



Web Table 2: Timing of PRWORA legislation implementation by state (1). Note that in our model specification, we did not attempt to distinguish between waiver and TANF policies, as prior analyses have noted there is not a consistent strategy for labeling legislative textual variations, although the language of the laws did differ across states in some ways in both waiver and TANF implementation specifications (1–5); careful prior analyses suggested that the major policy changes were sufficiently consistent across both waiver and TANF reforms as to use a single dummy variable across categories, as adopted here (4,6).

| State | Date Waiver Implemented (if any) | Date TANF Implemented |
|-------|----------------------------------|-----------------------|
| AL    |                                  | Nov-96                |
| AK    |                                  | Jul-97                |
| AZ    | Nov-95                           | Oct-96                |
| AR    | Jul-94                           | Jul-97                |
| CA    | Dec-92                           | Jan-98                |
| CO    |                                  | Jul-97                |
| CT    | Jan-96                           | Oct-96                |
| DE    | Oct-95                           | Mar-97                |
| DC    |                                  | Mar-97                |
| FL    |                                  | Oct-96                |
| GA    | Jan-94                           | Jan-97                |
| HI    | Feb-97                           | Jul-97                |
| ID    |                                  | Jul-97                |
| IL    | Nov-93                           | Jul-97                |
| IN    | May-95                           | Oct-96                |
| IA    | Oct-93                           | Jan-97                |
| KS    |                                  | Oct-96                |
| KY    |                                  | Oct-96                |
| LA    |                                  | Jan-97                |
| ME    |                                  | Nov-96                |
| MD    | Mar-96                           | Dec-96                |
| MA    | Nov-95                           | Sep-96                |
| MI    | Oct-92                           | Sep-96                |
| MN    |                                  | Jul-97                |
| MS    | Oct-95                           | Jul-97                |
| MO    | Jun-95                           | Feb-97                |
| MT    | Feb-96                           | Feb-97                |
| NE    | Oct-95                           | Dec-96                |
| NV    |                                  | Dec-96                |
| NH    |                                  | Oct-96                |
| NJ    | Oct-92                           | Jul-97                |

|    |        |        |
|----|--------|--------|
| NM |        | Jul-97 |
| NY |        | Nov-97 |
| NC | Jul-96 | Jan-97 |
| ND |        | Jul-97 |
| OH | Jul-96 | Oct-96 |
| OK |        | Oct-96 |
| OR | Feb-93 | Oct-96 |
| PA |        | Mar-97 |
| RI |        | Jun-97 |
| SC |        | Oct-96 |
| SD | Jun-94 | Dec-96 |
| TN | Sep-96 | Oct-96 |
| TX | Jun-96 | Nov-96 |
| UT | Jan-93 | Oct-96 |
| VT | Jul-94 | Sep-96 |
| VA | Jul-95 | Feb-97 |
| WA | Jan-96 | Jan-97 |
| WV | Feb-96 | Jan-97 |
| WI | Jan-96 | Sep-97 |
| WY |        | Jan-97 |

Web Table 3: Placebo analysis using synthetic control methods.<sup>a</sup>

| Health outcome        | Weighting of each candidate control group |                    |                     | Difference in estimate between intervention and control groups |                    |                     |
|-----------------------|-------------------------------------------|--------------------|---------------------|----------------------------------------------------------------|--------------------|---------------------|
|                       | Married mothers                           | Single non-mothers | Married non-mothers | Married mothers                                                | Single non-mothers | Married non-mothers |
| Safe drinking         | 0                                         | 1                  | 0                   | -11%                                                           | -9%                | -12%                |
| Not smoking           | 0                                         | 1                  | 0                   | -10%                                                           | -8%                | -10%                |
| Days good mntl health | 0.496                                     | 0.504              | 0                   | -5%                                                            | -4%                | -6%                 |
| Medical access        | 0                                         | 1                  | 0                   | -9%                                                            | -12%               | -17%                |
| Able to afford doc    | 1                                         | 0                  | 0                   | -13%                                                           | -12%               | -16%                |
| Pap screen            | 0.154                                     | 0.846              | 0                   | -7%                                                            | -5%                | -5%                 |
| Mammogram             | 1                                         | 0                  | 0                   | -6%                                                            | -16%               | -23%                |

<sup>a</sup> The estimate shown is the difference between the health outcome change estimated for the intervention group (single mothers) and the health outcome change estimated if each of the control groups (married mothers, single non-mothers, or married non-mothers) are treated as an intervention group and analyzed using the synthetic control method (a falsification test to examine if spurious correlations occur). The coefficients that are negative reflect that the change among the ‘true’ intervention group is always greater (more negative, a worse health outcome) than among the control group populations. This test suggests that our estimated effects for single mothers are typically unusually large relative to the distribution of the estimate that we obtain when we apply the same analysis to each of the populations that make up the control group. See main text Table 1 for health outcome definitions and summary statistics.

Web Table 4: Welfare reforms and health outcomes among single mothers in the Behavioral Risk Factor Surveillance System (1993-2012). Model coefficients corresponding to main text Figure 1 are provided in the Table below. The coefficients reflect the estimated association between the 1996 welfare reforms and the change in health status of single mothers, using both a difference-in-difference-in-difference model and a synthetic control estimation method. The difference-in-difference-in-differences model expressed in main text equation 1 attempts to correct for pre-existing secular trends in health, and unmeasured time-invariant and time-varying confounders between the single mothers and ‘control’ groups (married mothers, single non-mothers and married non-mothers). The synthetic control method compares single mothers to a control group constructed by weighting members of the less affected groups (married mothers, single non-mothers and married non-mothers) to better match the health characteristics of single mothers prior to welfare reforms, in order to strengthen the quality of inferences when there is no single ideal control group. The coefficients reflect a change in the probability of a health outcome; negative results reflect worsening health, i.e., single mothers experienced a 4.0% lower chance of safe alcohol drinking in association with the welfare reforms, per the difference-in-difference-in-difference model. Outcomes are defined in main text Table 1. 95% confidence intervals are in parentheses.

| Outcome               | Change in probability of outcome associated with welfare reform, difference-in-difference-in-difference model | Change in probability of outcome associated with welfare reform, synthetic control approach |
|-----------------------|---------------------------------------------------------------------------------------------------------------|---------------------------------------------------------------------------------------------|
| Safe drinking         | -4.0 (-7.0, -0.9)                                                                                             | -8.3 (-12.0, -4.7)                                                                          |
| Not smoking           | -0.6 (-2.7, 1.5)                                                                                              | -8.8 (-10.8, -6.8)                                                                          |
| Days good mntl health | -0.4 (-1.7, 0.9)                                                                                              | -4.9 (-6.5, -3.3)                                                                           |
| Medical access        | -2.4 (-4.8, 0.1)                                                                                              | -10.7 (-19.5, -1.9)                                                                         |
| Able to afford doc    | -2.4 (-4.8, 0.0)                                                                                              | -10.8 (-15.8, -5.7)                                                                         |
| Pap screen            | -0.8 (-2.3, 0.6)                                                                                              | -5.3 (-9.8, -0.8)                                                                           |
| Mammogram             | -0.8 (-2.8, 1.3)                                                                                              | -7.9 (-12.9, -2.9)                                                                          |

Web Table 5: Welfare reforms and health outcomes among employed (blue squares) and unemployed (orange circles) single mothers in the Behavioral Risk Factor Surveillance System (1993-2012), based on difference-in-difference-in-difference specifications. The coefficients reflect the estimated association between the 1996 welfare reforms and the change in health status of single mothers by employment status, using a difference-in-difference-in-difference model; see main text Figure 2. The difference-in-difference-in-differences model expressed in main text equation 1 attempts to correct for pre-existing secular trends in health, and unmeasured time-invariant and time-varying confounders between the single mothers and ‘control’ groups (married mothers, single non-mothers and married non-mothers). The coefficients reflect a change in the probability of a health outcome; negative results reflect worsening health, i.e., employed single mothers experienced a 3.1% lower chance of safe alcohol drinking in association with the welfare reforms. Outcomes are defined in main text Table 1. 95% confidence intervals are in parentheses.

| Outcome               | Change in probability of outcome associated with welfare reform, difference-in-difference model among unemployed | Change in probability of outcome associated with welfare reform, difference-in-difference-in-difference model among employed |
|-----------------------|------------------------------------------------------------------------------------------------------------------|------------------------------------------------------------------------------------------------------------------------------|
| Safe drinking         | -5.9 (-11.6, -0.1)                                                                                               | -3.1 (-6.8, 0.7)                                                                                                             |
| Not smoking           | -0.7 (-3.9, 2.5)                                                                                                 | -0.2 (-2.9, 2.6)                                                                                                             |
| Days good mntl health | -3.2 (-5.4, -1.0)                                                                                                | -0.7 (-2.3, 0.9)                                                                                                             |
| Medical access        | -0.1 (-4.1, 4.0)                                                                                                 | -3.7 (-6.7, -0.8)                                                                                                            |
| Able to afford doc    | -5.2 (-7.9, -2.5)                                                                                                | -0.4 (-2.7, 2.0)                                                                                                             |
| Pap screen            | -1.6 (-4.1, 0.9)                                                                                                 | -0.6 (-2.2, 1.0)                                                                                                             |
| Mammogram             | -3.7 (-6.7, -0.7)                                                                                                | -2.4 (-5.0 0.2)                                                                                                              |

Web Figure 1: Given the potential that the Affordable Care Act passed in 2010 could differentially affect the intervention and control groups, we re-ran analyses after censoring the data at 2010. The results were essentially unchanged, as shown below. The figure presents the estimated percentage point change in health status of single mothers associated with the 1996 welfare reforms, using both a difference-in-difference-in-difference model (blue squares) and a synthetic control estimation method (orange circles). The difference-in-difference-in-differences model expressed in equation 1 of the main text corrects for pre-existing secular trends in health, and unmeasured time-invariant and time-varying confounders between the single mothers and ‘control’ groups (married mothers, single non-mothers and married non-mothers). The synthetic control method compares single mothers to a control group constructed by weighting members of the less affected groups (married mothers, single non-mothers and married non-mothers) to better match the health characteristics of single mothers prior to welfare reforms, in order to strengthen the quality of inferences when there is no single ideal control group. The y-axis reflects a change in the probability of a health outcome; negative results reflect worsening health. Outcomes are defined in Table 1. 95% confidence intervals are displayed as error bars.

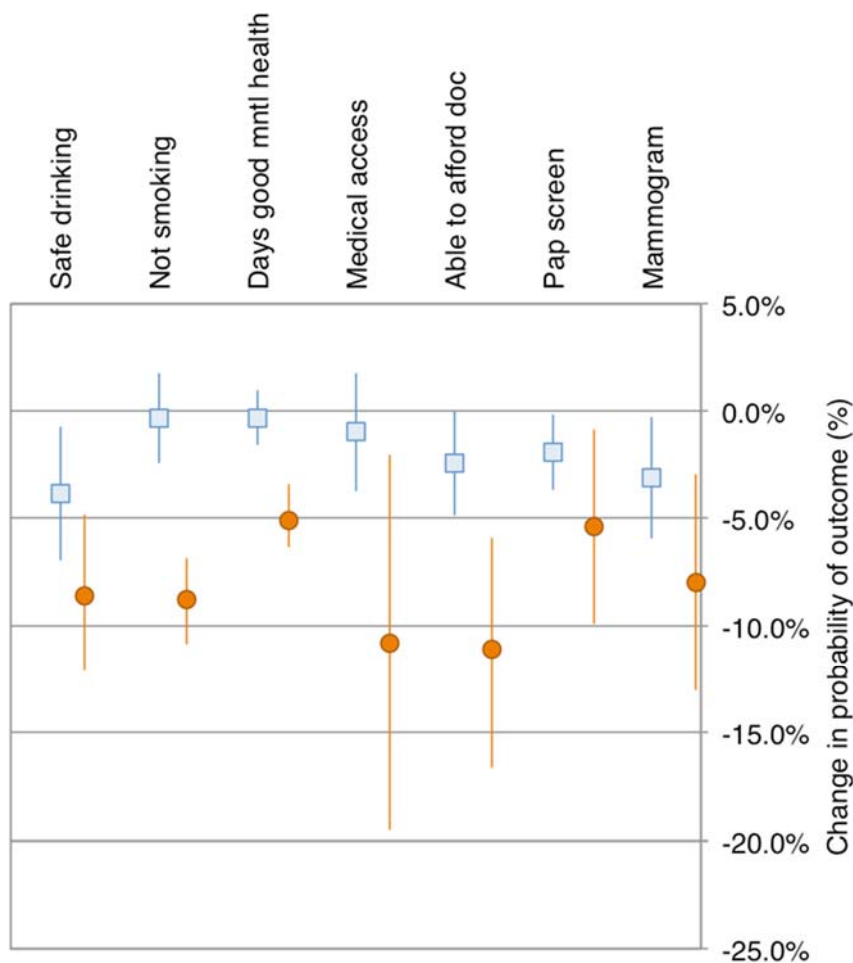

## Appendix References

1. O'Neill J, Hill M. Gaining Ground? Measuring the Impact of Welfare Reform on Welfare and Work. New York: Center for Civic Innovation; 2001.
2. Blank RM. Evaluating Welfare Reform in the United States. National Bureau of Economic Research; 2002 (Accessed October 24, 2014).(<http://www.nber.org/papers/w8983>, p.12). (Accessed October 24, 2014)
3. Grogger J, Karoly LA, Klerman JA. Consequences of Welfare Reform: A Research Synthesis. Santa Monica: The RAND Corporation; 2002 (Accessed October 24, 2014).(<http://lbr.rand.org/pubs/drafts/DRU2676.html>). (Accessed October 24, 2014)
4. Bitler MP, Gelbach JB, Hoynes HW. Welfare reform and health. *J. Hum. Resour.* 2005;40(2):309–334.
5. Kaestner R, Kaushal N. Welfare reform and health insurance coverage of low-income families. *J. Health Econ.* 2003;22(6):959–981.
6. Kaushal N, Gao Q, Waldfogel J. Welfare Reform and Family Expenditures: How Are Single Mothers Adapting to the New Welfare and Work Regime? *Soc. Serv. Rev.* 2007;81(3):369–396.
